# Supplementary material
Source: PubMed Central journal article supplement (PMC2773208)

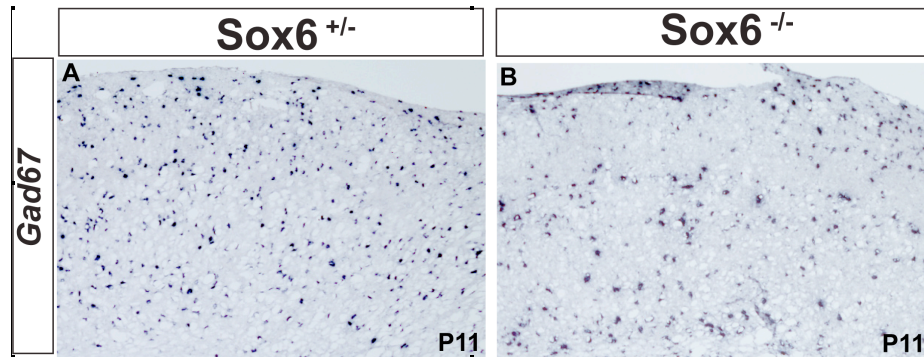

**Figure S1. Cortical interneurons are mispositioned and molecular markers are affected in Sox6 null animals**

(A-B) To test if the absence of *Sox6* affects cortical interneurons, we analyzed *Gad67* expression in P11 (A) control (*Sox6*<sup>+/+</sup>) animals and (B) mutant *Sox6*<sup>-/-</sup> animals. *Gad67* is expressed relatively equivalently in both controls and mutants, but the distribution of *Gad67*-expressing cells is dramatically altered. *Gad67*-expressing cells in the mutant preferentially occupy layers I and VI at the expense of layers II-V. (C) The expression of molecular interneuron markers was calculated by counting the total number of cells expressing the specific marker per optical section. We saw a large decrease on the number of interneurons expressing PV, SST and SST/CR, while NPY was increased. Scale bar in (A) 60 $\mu$ m in A and B.

## Supplemental Figure 2. Pyramidal cell and cortical interneuron fate is not obviously affected in $Emx1^{Cre}$ mediated $Sox6$ removal

(A,B) In order to determine if the fate and/or distribution of pyramidal cells and interneurons were affected in  $Emx1$  driven  $Sox6$  removal,

telencephalic coronal sections of control ( $Sox6^{F/+};Emx1^{Cre}$ ) and mutant ( $Sox6^{F/F};Emx1^{Cre}$ ) mice were analyzed. We did not detect any difference between control and mutant cortices in any of the pyramidal markers analyzed, namely  $Ctip2$  (A,B) and  $Satb2$  (C,D). Similarly, we did not detect any difference in the expression of cortical

interneuron molecular markers, namely PV (E,F), SST (G,H) and NPY (I,J). (K) Shows the total number of cells expressing a given interneuron maker per optical field. PV: control ( $127\pm 11$ ) vs. mutant ( $110\pm 12$ ); SST: control ( $76\pm 9$ ) vs. mutant ( $78\pm 7$ ); NPY: control ( $27\pm 6$ ) vs. mutant ( $33\pm 9$ ). In this experiment we analyzed a total of three animals. All the analyses were confined to the somatosensory cortex. Scale bar in (A) corresponds to  $50\mu m$  in A-C, and  $70\mu m$  in E-J.

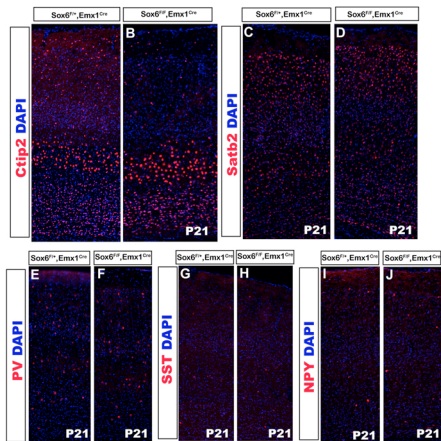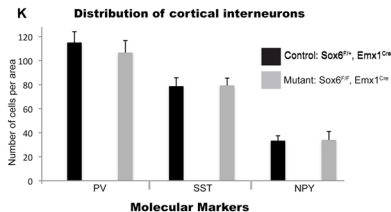

Supplement: NIHMS144769-supplement-02.pdf [file NIHMS144769-supplement-02.pdf]
